# Supplementary material
Source: ML conference proceedings conference paper supplement (https://aclanthology.org/D19-1170)
Supplement: Attachment [file D19-1170.Attachment.zip]

**A Multi-Type Multi-Span Network for  
Reading Comprehension that Requires Discrete Reasoning  
(Supplemental Material)**

**Minghao Hu, Yuxing Peng, Zhen Huang, Dongsheng Li**  
National University of Defense Technology, Changsha, China  
{huminghao09, pengyuxing, huangzhen, dsli}@nudt.edu.cn

**A Supplemental Material**

| Error Type             | (%) | Passage Snippets                                                                                                             | Question                                                                                 | Answer         | Prediction    |
|------------------------|-----|------------------------------------------------------------------------------------------------------------------------------|------------------------------------------------------------------------------------------|----------------|---------------|
| Arithmetic computation | 38  | ... there were 256,644 people living in Northern Cyprus. ... 2,482 born in the UK ...                                        | How many people in Northern Cyprus were not born in the UK?                              | 254,162        | 144,923       |
| Sorting                | 18  | ... 56.2% were between the ages of 18 and 24; 16.1% were from 25 to 44; 10.5% were from 45 to 64 ...                         | Which age group had the most people?                                                     | 18 and 24      | from 45 to 64 |
| Multi-span extraction  | 13  | Montana finished the regular season with ... 18 touchdowns, ... Craig was also a key contributor, ... and 10 touchdowns ...  | Which players scored ten or more touchdowns?                                             | Craig, Montana | Craig, Rice   |
| Single-span extraction | 10  | ... The sector decreased by 7.8 percent in 2002, before rebounding in 2003 with a 1.6 percent growth rate.                   | In what year did the service sector have a sharp drop in growth rate?                    | 2002           | 2003          |
| Counting               | 8   | ... Macedonians with 338,358 inhabitants, Albanians with 103,891 ... Roma people with 23,475, Serbs (14,298 inhabitants) ... | How many of the ethnic groups listed had more than 10,000 inhabitants in Skopje in 2002? | 4              | 3             |
| Span number            | 8   | ... Tamil people form the majority of Chennais population. ... Chennais population was 80.7% Hindu, 9.5% Muslim ...          | Which religious people are the most common in Chennai?                                   | Hindu          | Hindu Tamil   |
| Other                  | 5   | ... 521,938 (6.6%) of the economically active were unemployed ...                                                            | How many in percent of the economically active were employed ?                           | 93.4           | 48.4          |

Table 1: Error analysis on the DROP dev set. 100 randomly-sampled examples are classified into 7 categories. We list the error type, the ratio of each category, some representative examples, and our erroneous predictions.
